# Supplementary material
Source: PubMed Central journal article supplement (PMC5738024)
Supplement: NIHMS927015-supplement-2.pdf [file NIHMS927015-supplement-2.pdf]

**Figure S2. Performance of tTG IgA for detection of Marsh 2-3 lesions in patients with biopsy confirmed celiac disease on a gluten-free diet.**

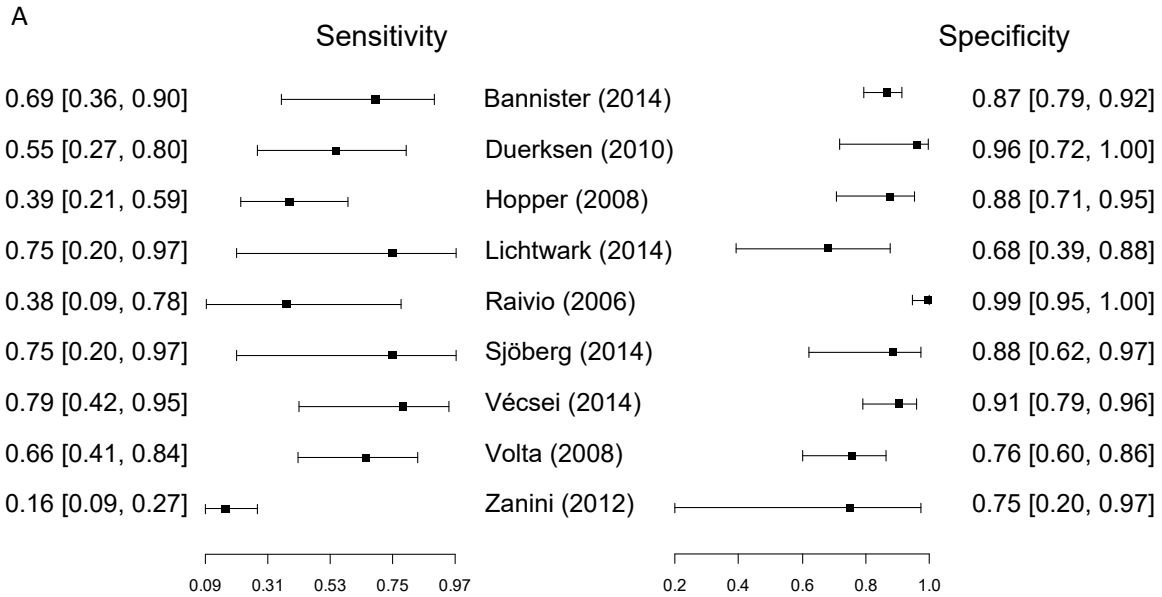

**B**

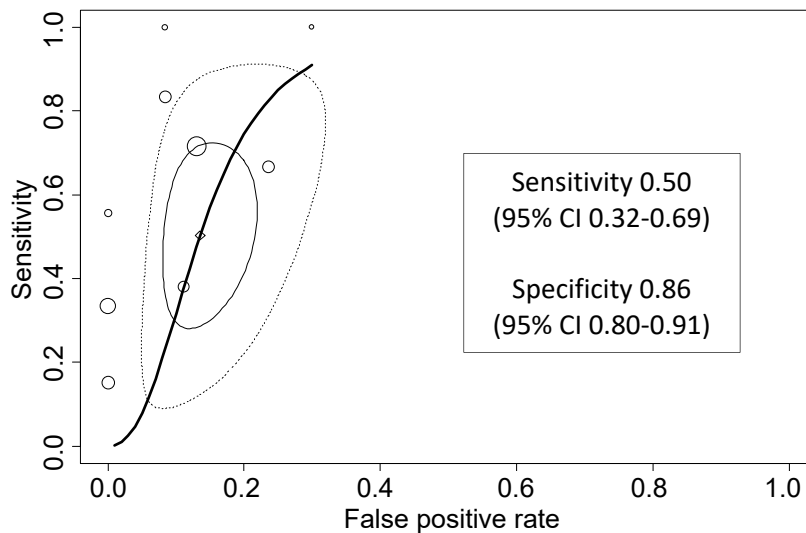

**A.** Forest plot of sensitivity and specificity of tTG IgA for detection of Marsh 2 or 3 lesions on a gluten-free diet. **B.** Summary receiver operating characteristic curve of tTG IgA for Marsh 2 or 3 lesions. In addition to individual and summary points, the 95% confidence region (solid circle) denotes the precision of the pooled estimate of the available studies and the 95% prediction region (dashed circle) shows the area where the next study is likely to lie, which reflects variability among studies.
