# Supplementary material
Source: PubMed Central journal article supplement (PMC5738024)
Supplement: NIHMS927015-supplement-4.pdf [file NIHMS927015-supplement-4.pdf]

## Systematic Review and Meta-Analysis of the Sensitivity and Specificity of TTG and EMA IgA antibodies for persistent mucosal damage in persons with celiac disease following a gluten-free diet: Literature search documentation

**Andrea Szwajcer**, MLIS, AHIP, St. Boniface Hospital and WRPCP Librarian,

[andrea.szwajcer@umanitoba.ca](mailto:andrea.szwajcer@umanitoba.ca)

Carolyn Sifton-Helene Fuld Library, St. Boniface Hospital, 351 Tache Ave. Winnipeg, MB R2H 2A6

**Jocelyn Silvester**, MD, FRCPC, PhD

The following literature search report has been conducted using the STARLITE method.<sup>1</sup>

### SAMPLING STRATEGY

- The systematic review hypothesis of concern is categorized as a diagnostic test question; as such, all relevant study designs including observational were included
- The primary investigator (JS) provided prior to the search investigation an established list of citations known to the investigator that met the inclusion criteria in the study proposal (*see List of References to Determine Search Validity*)
- Database selection was based on question type, and study designs of interest, consequently sampling expanded beyond clinical literature to include trial registry (clinicaltrials.gov) and basic biological sciences (BIOSIS)
- Conference proceedings were not desired by the primary investigator (JS) thus no gray literature and hand searching was conducted
- Date limits were established after initial sampling was conducted to confirm when specific tests came into use
- Possible strategies used by the Cochrane Upper Gland Pancreatic Diseases group was explored but none available
- Analysis of the results utilizing the validity set determined that the strategy include various combinations of the following concepts: disease, serology, diet, histology, follow-up – see also *Terms Used*

### List of References to Determine Search Validity

1. Ciacci, C., Cirillo, M., Cavallaro, R., & Mazzacca, G. (2002). **Long-term follow-up of celiac adults on gluten-free diet: prevalence and correlates of intestinal damage.** *Digestion*, 66(3), 178-185. doi: 66757
2. Dewar, D. H., Donnelly, S. C., McLaughlin, S. D., Johnson, M. W., Ellis, H. J., & Ciclitira, P. J. (2012). **Celiac disease: management of persistent symptoms in patients on a gluten-free diet.** *World journal of gastroenterology : WJG*, 18(12), 1348-1356. doi: 10.3748/wjg.v18.i12.1348

---

<sup>1</sup> Booth, A. 2006. "Brimful of STARLITE": towards standards for reporting literature searches. *J Med Lib Assoc*, October; 94(4): 421-429. Available at:  
<https://www.ncbi.nlm.nih.gov/pmc/articles/PMC1629442/pdf/j1536-5050-094-04-0421.pdf>

3. Hopper, A. D., Hadjivassiliou, M., Hurlstone, D. P., Lobo, A. J., McAlindon, M. E., Egner, W., . . . Sanders, D. S. (2008). **What is the role of serologic testing in celiac disease? A prospective, biopsy-confirmed study with economic analysis.** *Clinical gastroenterology and hepatology : the official clinical practice journal of the American Gastroenterological Association*, 6(3), 314-320. doi: 10.1016/j.cgh.2007.12.008
4. Kaukinen, K., Sulkanen, S., Maki, M., & Collin, P. (2002). **IgA-class transglutaminase antibodies in evaluating the efficacy of gluten-free diet in coeliac disease.** *European journal of gastroenterology & hepatology*, 14(3), 311-315.
5. Rubio-Tapia, A., Rahim, M. W., See, J. A., Lahr, B. D., Wu, T. T., & Murray, J. A. (2010). **Mucosal recovery and mortality in adults with celiac disease after treatment with a gluten-free diet.** *The American Journal of Gastroenterology*, 105(6), 1412-1420. doi: 10.1038/ajg.2010.10
6. Selby, W. S., Painter, D., Collins, A., Faulkner-Hogg, K. B., & Loblay, R. H. (1999). **Persistent mucosal abnormalities in coeliac disease are not related to the ingestion of trace amounts of gluten.** *Scandinavian journal of gastroenterology*, 34(9), 909-914.
7. Tonutti, E., Visentini, D., Picierno, A., Bizzaro, N., Villalta, D., Tozzoli, R., . . . Brusca, I. (2009). **Diagnostic efficacy of the ELISA test for the detection of deamidated anti-gliadin peptide antibodies in the diagnosis and monitoring of celiac disease.** *Journal of clinical laboratory analysis*, 23(3), 165-171. doi: 10.1002/jcla.20313
8. Tursi, A., Brandimarte, G., & Giorgetti, G. M. (2003). **Lack of usefulness of anti-transglutaminase antibodies in assessing histologic recovery after gluten-free diet in celiac disease.** *Journal of clinical gastroenterology*, 37(5), 387-391.
9. Vahedi, K., Mascart, F., Mary, J. Y., Laberenne, J. E., Bouhnik, Y., Morin, M. C., . . . Matuchansky, C. (2003). **Reliability of antitransglutaminase antibodies as predictors of gluten-free diet compliance in adult celiac disease.** *The American Journal of Gastroenterology*, 98(5), 1079-1087. doi: 10.1111/j.1572-0241.2003.07284.x

## TYPES OF STUDIES

- No study design filter/limit was applied
- Primary research was only considered: see also *Inclusion and Exclusions*
- Investigative methods appropriate for laboratory methodology:
  - Randomized controlled trial
  - Case-control
  - Cohort
  - Cross-sectional

## APPROACHES: Not applicable

## RANGE OF YEARS

- Initial strategy did not include date limit; date ranges in databases include 1966- (PubMed), 1970- (Science Citation Index, Web of Science), 1971 – (Scopus), and 1974 – (Embase)
- Two updates:
  - January 2012 (initial search ended in mid 2012) to January 2016
  - January 2016 – January 2017

## LIMITS

- English and Human

Szwajcer, Silvester – SR Sensitivity and Specificity of TTG and EMA IgA antibodies: Literature Search Documentation (2016)

## INCLUSION AND EXCLUSIONS

### Inclusion:

- Studies that describe diagnostic, prognostic, sensitivity and specificity qualities of serum-based celiac antibody tests
- Studies published in adult or pediatric populations
- Studies describing detection of mucosal damage via dietary assessment in patients prescribed or on gluten-free diet

### Exclusion:

- Studies describing only celiac tests for diagnosis of celiac disease
- Involve animals
- Human-based studies that either do not have biopsy-proven diagnosis of celiac, or have not been prescribed a gluten-free diet
- Studies reporting use of an index standard other than the reference standard of small intestinal histopathology/biopsy and the measurement of celiac antibodies in tissues/samples other than blood
- Studies not reporting primary research; case or case-series reports

**ELECTRONIC SOURCES:** PubMed Medline; Embase (OVID); CENTRAL (Cochrane Library, Wiley); Science Citation Index (Web of Science, ISI); Scopus (Elsevier); BIOSIS Previews (Web of Science, ISI); ClinicalTrials.gov

## TERMS USED/STRATEGIES:

### PubMed

- #1 ((celiac disease[MeSH Terms])) OR (coeliac disease[tiab] OR celiac disease[tiab])
- #2 (((("Serologic Tests"[Mesh:noexp])) OR (((("Antibodies"[Mesh:noexp]) OR "Antibodies, Anti-Idiotypic"[Mesh]) OR (((("Immunoglobulins"[Mesh:noexp]) OR "Immunoglobulin A"[Mesh:noexp]) OR "Immunoglobulin G"[Mesh:noexp])) AND ("Transglutaminases"[Mesh:noexp])))) OR (((("Immunoglobulins"[Mesh:noexp]) OR "Immunoglobulin A"[Mesh:noexp]) OR "Immunoglobulin G"[Mesh:noexp]) AND (("Enzyme-Linked Immunosorbent Assay"[Mesh:noexp]) OR ("Fluorescent Antibody Technique"[Mesh:noexp])))) OR (((IgA antitransglutaminase[Title/Abstract]) OR (anti tissue transglutaminase[tiab] OR anti-tissue transglutaminase[tiab]) OR (tissue transglutaminase[tiab] OR tTG[tiab]) OR (IgA-class[tiab] AND transglutaminase[tiab]) OR (anti-tTG[tiab] OR anti tTG[tiab])) OR ((immunoglobulin G antibod\*[tiab] OR IgG antibod\*[tiab]) OR (immunoglobulin A antibod\*[tiab] OR IgA antibod\*[tiab])) OR ((anti gliadin antibod\*[tiab] OR anti-gliadin antibod\*[tiab]) OR (AGA[tiab] OR antigliadin[tiab]) OR (IgA-antigliadin antibody[tiab]) OR (((immunoglobulin G antibod\*[tiab] OR IgG antibod\*[tiab]) OR (immunoglobulin A antibod\*[tiab] OR IgA antibod\*[tiab])) AND ELISA[tiab])) OR ((antiendomysial antibod\*[tiab] OR EMA[tiab]) OR (anti-endomysium[tiab] OR anti endomysium[tiab] OR antiendomysium[tiab]) OR (IgA-endomysial antibod\*[tiab] OR IgA endomysial antibod\*[tiab]) OR (IgA-EMA[tiab])) OR

Szwajcer, Silvester – SR Sensitivity and Specificity of TTG and EMA IgA antibodies: Literature Search Documentation (2016)

- ((deamidated gliadin peptide antibody[tiab]) OR (a-DGP immunoglobulin A[tiab] OR a-DGP IgA[tiab]) OR (deamidated gliadin peptide\*[tiab] OR DGP[tiab])) OR (serologic\* AND test\*[tiab] OR serologic\* AND analysis[tiab] OR serologic\* AND response[tiab]) OR ((serologic\* AND test\*[tiab] OR serologic\* AND analysis[tiab] OR serologic\* AND response[tiab]) AND ((immunoglobulin A[tiab] OR IgA[tiab]) OR (immunoglobulin G[tiab] OR IgG[tiab]))) OR (antibodies[tiab] AND (IgA-gliadin[tiab] OR IgG- gliadin[tiab]))
- #3 (glutens[mh]) OR (diet, gluten-free[mh]) OR (gluten-free diet[tiab] OR gluten free diet[tiab]) OR (GFD[tiab])
- #4 (((biopsy[mh]) AND ((duodenum[mh]) OR (intestinal mucosa[mh]))) OR ((biopsy[tiab]) AND (((small-bowel[tiab] OR small bowel[tiab])) OR (duoden\*[tiab]) OR (intestinal[tiab]) OR ((small intestine\*[tiab] OR small-intestine\*[tiab]))))) OR ((small intestine\*[tiab] OR small-intestine\*[tiab]) AND morphology[tiab])
- #5 ("follow up studies"[MeSH Terms]) OR (patient compliance[mh]) OR (time factors[mh]) OR (follow-up[tiab] OR follow up[tiab] OR followup[tiab]) OR (compliance\*[tw] OR comply[tw] OR complied[tw] OR non-compliance\*[tw] OR noncompliance\*[tw]) OR ((compliance\*[tw] OR comply[tw] OR complied[tw] OR non-compliance\*[tw] OR noncompliance\*[tw]) OR (adherence\*[tw] OR non-adherence\*[tw] OR nonadherence\*[tw])) OR (monitor\*[tiab])
- #6 #1 AND #3 AND #4
- #7 #1 AND #2 AND #5
- #8 #1 AND #3 AND #5
- #9 #6 OR #7 OR #8

### **Embase**

- 1 exp celiac disease/
- 2 c?eliac disease.ti,ab.
- 3 1 or 2
- 4 gluten/
- 5 gluten free diet/
- 7 GFD.ti,ab.
- 8 4 or 5 or 7
- 9 exp celiac disease/
- 10 c?eliac disease.ti,ab.
- 11 9 or 10
- 12 serodiagnosis/ or serology/
- 13 immunoglobulin antibody/ or immunoglobulin a antibody/ or immunoglobulin g antibody/
- 14 antibody/ or antiidiotypic antibody/
- 15 protein glutamine gamma glutamyltransferase antibody/
- 16 protein glutamine gamma glutamyltransferase/
- 17 15 or 16
- 18 enzyme linked immunosorbent assay/
- 19 fluorescent antibody technique/ or immunofluorescence test/
- 20 13 or 14
- 21 17 and 20
- 22 18 or 19
- 23 13 and 22
- 24 12 or 21 or 23

- 25 (IgA antitransglutaminase or IgA anti-transglutaminase or IgA anti transglutaminase).ti,ab. (68)
- 26 (anti tissue transglutaminase or anti-tissue transglutaminase).ti,ab. (671)
- 27 (tissue transglutaminase or tTG).ti,ab. (4147)
- 28 (IgA-class adj transglutaminase).ti,ab. (2)
- 29 (anti-tTG or anti tTG).ti,ab. (508)
- 30 25 or 26 or 27 or 28 or 29 (4189)
- 31 (anti gliadin antibod\$ or anti-gliadin antibod\$).ti,ab. (272)
- 32 (AGA or antigliadin or anti-gliadin or anti gliadin).ti,ab. (10379)
- 33 IgA-antigliadin antibody.ti,ab. (20)
- 34 (immunoglobulin A antibod\$ or IgA antibod\$).ti,ab. (3773)
- 35 (immunoglobulin G antibod\$ or IgG antibod\$).ti,ab. (17734)
- 36 34 or 35 (20635)
- 37 ELISA.ti,ab. (161568)
- 38 36 and 37 (5502)
- 39 31 or 32 or 33 or 38 (15822)
- 40 (antiendomysial antibod\$ or EMA or anti-endomysial antibod\$ or anti endomysial antibod\$).ti,ab. (8252)
- 41 (IgA-endomysial antibod\$ or IgA endomysial antibod\$).ti,ab. (67)
- 42 IgA-EMA.ti,ab. (162)
- 43 endomysium antibody/ (1978)
- 44 40 or 41 or 42 or 43 (9465)
- 45 deamidated gliadin peptide antibody.ti,ab. (10)
- 46 (a-DGP immunoglobulin A or a-DGP IgA).ti,ab. (3)
- 47 (deamidated gliadin peptide\$ or DGP).ti,ab. (544)
- 48 45 or 46 or 47 (544)
- 49 (serologic\$ test\$ or serologic\$ analysis or serologic\$ response).ti,ab. (14823)
- 50 (immunoglobulin A or IgA).ti,ab. (34627)
- 51 (immunoglobulin G or IgG).ti,ab. (96355)
- 52 50 or 51 (114453)
- 53 49 and 52 (2460)
- 54 ((IgA-gliadin adj2 antibod\$) or (IgG-gliadin adj2 antibod\$)).ti,ab. (28)
- 55 53 or 54 (2485)
- 56 24 or 30 or 39 or 44 or 48 or 55 (97285)
- 57 exp follow up/ (906998)
- 58 patient compliance/ (94632)
- 59 time/ (221939)
- 60 (follow-up or follow up or followup).ti,ab. (882873)
- 61 (complan\$ or comply or complied or non-complan\$ or noncomplan\$).ti,ab. (131975)
- 62 (adher\$ or non-adher\$ or nonadher\$).ti,ab. (150343)
- 63 61 or 62 (271854)
- 64 monitor\$.ti,ab. (625081)
- 65 57 or 58 or 59 or 60 or 63 or 64 (2149033)
- 66 11 and 56 and 65 (1234)
- 67 8 and 11 and 65 (1952)
- 68 exp duodenum biopsy/ or exp intestine biopsy/ or biopsy/ (118862)
- 69 intestine mucosa/ (16194)
- 70 biopsy.ti,ab. (254942)

- 71 (small-bowel or small bowel).ti,ab. (28392)
- 72 duodenal.ti,ab. (32031)
- 73 intestinal.ti,ab. (173634)
- 74 (small intestin\$ or small-intestin\$).ti,ab. (39975)
- 75 71 or 72 or 73 or 74 (234582)
- 76 70 and 75 (11841)
- 77 68 or 69 or 76 (138445)
- 78 morphology.ti,ab. (19906)
- 79 74 and 78 (1101)
- 80 77 or 79 (139321)
- 81 3 and 8 and 80 (2731)
- 82 66 or 67 or 81 (4195)
- 83 limit 82 to yr="2012 -Current" (1584)
- 84 limit 83 to english language (1523)
- 85 limit 84 to (embase and article) (524)
- 86 from 84 keep 1-1523 (1523)

### **CENTRAL**

- #1 MeSH descriptor: [Celiac Disease] explode all trees
- #2 "coeliac disease" or "celiac disease":ti,ab,kw (Word variations have been searched)
- #3 #1 or #2
- #4 MeSH descriptor: [Antibodies] this term only
- #5 MeSH descriptor: [Antibodies, Anti-Idiotypic] this term only
- #6 #4 or #5
- #7 MeSH descriptor: [Immunoglobulin G] this term only
- #8 MeSH descriptor: [Immunoglobulins] this term only
- #9 MeSH descriptor: [Immunoglobulin A] this term only
- #10 #7 or #8 or #9
- #11 MeSH descriptor: [Transglutaminases] this term only
- #12 MeSH descriptor: [Enzyme-Linked Immunosorbent Assay] this term only
- #13 MeSH descriptor: [Fluorescent Antibody Technique] this term only
- #14 MeSH descriptor: [Serologic Tests] this term only
- #15 (#6 or #10) and #11
- #16 (#12 or #13) and #10
- #17 #14 or #15 or #16
- #18 "anti-tissue transglutaminase":ti,ab,kw (Word variations have been searched)
- #19 "tissue transglutaminase" or tTG:ti,ab,kw (Word variations have been searched)
- #20 IgA-class transglutaminase:ti,ab,kw (Word variations have been searched)
- #21 anti-tTG:ti,ab,kw (Word variations have been searched)
- #22 #18 or #19 or #20 or #21
- #23 anti-gliadin antibod\*:ti,ab,kw (Word variations have been searched)
- #24 AGA or antigliadin:ti,ab,kw (Word variations have been searched)
- #25 IgA-antigliadin antibody:ti,ab,kw (Word variations have been searched)
- #26 immunoglobulin A antibod\* or IgA antibod\*:ti,ab,kw (Word variations have been searched)
- #27 immunoglobulin G antibod\* or IgG antibod\*:ti,ab,kw (Word variations have been searched)

- #28 ELISA or enzyme-linked immunosorbent assay:ti,ab,kw (Word variations have been searched)
- #29 (#26 or #27) and #28
- #30 #23 or #24 or #25 or #28
- #31 antiendomysial antibod\* or EMA or anti-endomysium:ti,ab,kw (Word variations have been searched)
- #32 deamidated gliadin peptide antibody or a-DGP immunoglobulin A or a-DGP IgA or deamidated gliadin peptide\* or DGP:ti,ab,kw (Word variations have been searched)
- #33 serologic\* test\* or serologic\* analysisOR serologic\* response:ti,ab,kw (Word variations have been searched)
- #34 (#26 or #27) and #33
- #35 antibodies and (IgA-gliadin or IgG-gliadin):ti,ab,kw (Word variations have been searched)
- #36 #17 or #22 or #30 or #31 or #32 or #34 or #35
- #37 MeSH descriptor: [Glutens] explode all trees
- #38 MeSH descriptor: [Diet, Gluten-Free] explode all trees
- #39 gluten-free diet or GFD:ti,ab,kw (Word variations have been searched)
- #40 #37 or #38 or #39

### ***Science Citation Index (Web of Science)***

- #1 (TS=("coeliac disease" OR "celiac disease")) AND Language=(English) AND Document Types=(Article)
- #2 (TS=(antibod\*)) AND Language=(English) AND Document Types=(Article)
- #3 (TS=(Immunoglobulin? OR "Immunoglobulin A" OR "Immunoglobulin G" OR IgA OR IgG)) AND Language=(English) AND Document Types=(Article)
- #4 (TS=(transglutaminase?)) AND Language=(English) AND Document Types=(Article)
- #5 (TS=("Enzyme-Linked Immunosorbent Assay" OR "enzyme linked immunosorbent assay" OR ELISA)) AND Language=(English) AND Document Types=(Article)
- #6 (TS=("Fluorescent Antibody" NEAR/1 Technique) OR TS=("Fluorescent Antibody" NEAR/1 Test)) AND Language=(English) AND Document Types=(Article)
- #7 ((#2 OR #3) AND #4) AND Language=(English) AND Document Types=(Article)
- #8 ((#5 OR #6) AND #3) AND Language=(English) AND Document Types=(Article)
- #9 #8 OR #7
- #10 (TS=(IgA NEAR/1 antitransglutaminase) OR TS=("anti tissue" NEAR/1 transglutaminase ) OR TS=(anti-tissue NEAR/1 transglutaminase) OR TS=("tissue transglutaminase" OR tTG) OR TS=(IgA-class NEAR/1 transglutaminase) OR TS=(anti-tTG OR "anti tTG")) AND Language=(English) AND Document Types=(Article)
- #11 (TS=("immunoglobulin A" NEAR/1 antibod\*) OR TS=(IgA NEAR/1 antibod\*) OR TS=("immunoglobulin G" NEAR/1 antibod\*) OR TS=(IgG NEAR/1 antibod\*)) AND Language=(English) AND Document Types=(Article)
- #12 (TS=("anti gliadin" NEAR/1 antibod\*) OR TS=(anti-gliadin NEAR/1 antibod\*) OR TS=(AGA OR antigliadin)) AND Language=(English) AND Document Types=(Article)
- #13 #11 AND #5
- #14 #13 OR #12
- #15 (TS=(antiendomysial NEAR/1 antibod\*) OR TS=(EMA) OR TS=(anti-endomysium OR "anti endomysium" OR antiendomysium) OR TS=(IgA-EMA)) AND Language=(English) AND Document Types=(Article)

- #16 (TS=("deamidated gliadin peptide antibody") OR TS=("deamidated gliadin" NEAR/1 peptide\*) OR TS=DGP OR TS=("immunoglobulin A" NEAR/1 a-DGP) OR TS=(IgA NEAR/1 a-DGP)) AND Language=(English) AND Document Types=(Article)
- #17 (TS=(serologic\*NEAR/1 test) OR TS=(serologic\* NEAR/1 analysis) OR TS=(serologic\* NEAR/1 response) OR TS=(serum NEAR/1 test) OR TS=(serum NEAR/1 analysis)) AND Language=(English) AND Document Types=(Article)
- #18 #17 AND #3
- #19 #18 OR #16 OR #15 OR #14 OR #10 OR #9
- #20 (TS=(gluten) OR TS=(glutens) OR TS=(gluten-free NEAR/1 diet) OR TS=("gluten free" NEAR/1 diet) OR TS=GFD) AND Language=(English) AND Document Types=(Article)
- #21 (TS=biopsy) AND Language=(English) AND Document Types=(Article)
- #22 (TS=duodenum OR TS=("intestinal mucosa") OR TS=(small-bowel OR "small bowel") OR TS=intestin\*) AND Language=(English) AND Document Types=(Article)
- #23 (TS=(small NEAR/1 intestin\*) OR TS=small-intestin\*) AND Language=(English) AND Document Types=(Article)
- #24 #23 OR #22
- #25 #24 AND #21
- #26 (TS=morphology) AND Language=(English) AND Document Types=(Article)
- #27 #26 AND #23
- #28 #27 OR #25
- #29 (TS=("patient compliance") OR TS=(follow-up OR "follow up" OR followup) OR TS=(compliant\* OR comply OR complied OR non-compliant\* OR noncompliant\*) OR TS=(adher\* OR non-adher\* OR nonadher\*) OR TS=monitor\*) AND Language=(English) AND Document Types=(Article)
- #30 #29 AND #20 AND #1
- #31 #29 AND #19 AND #1
- #32 #28 AND #20 AND #1
- #33 #32 OR #31 OR #30
